# Supplementary material for: Electroacupuncture on the Scalp over the Motor Cortex Ameliorates Behavioral Deficits Following Neonatal Hypoxia-Ischemia in Rats via the Activation of Neural Stem Cells
Source: MDPI journal article supplement (doi:10.3390/life10100240), 2020-10-14
Supplement: s1 [file s1]

# Supplementary Materials

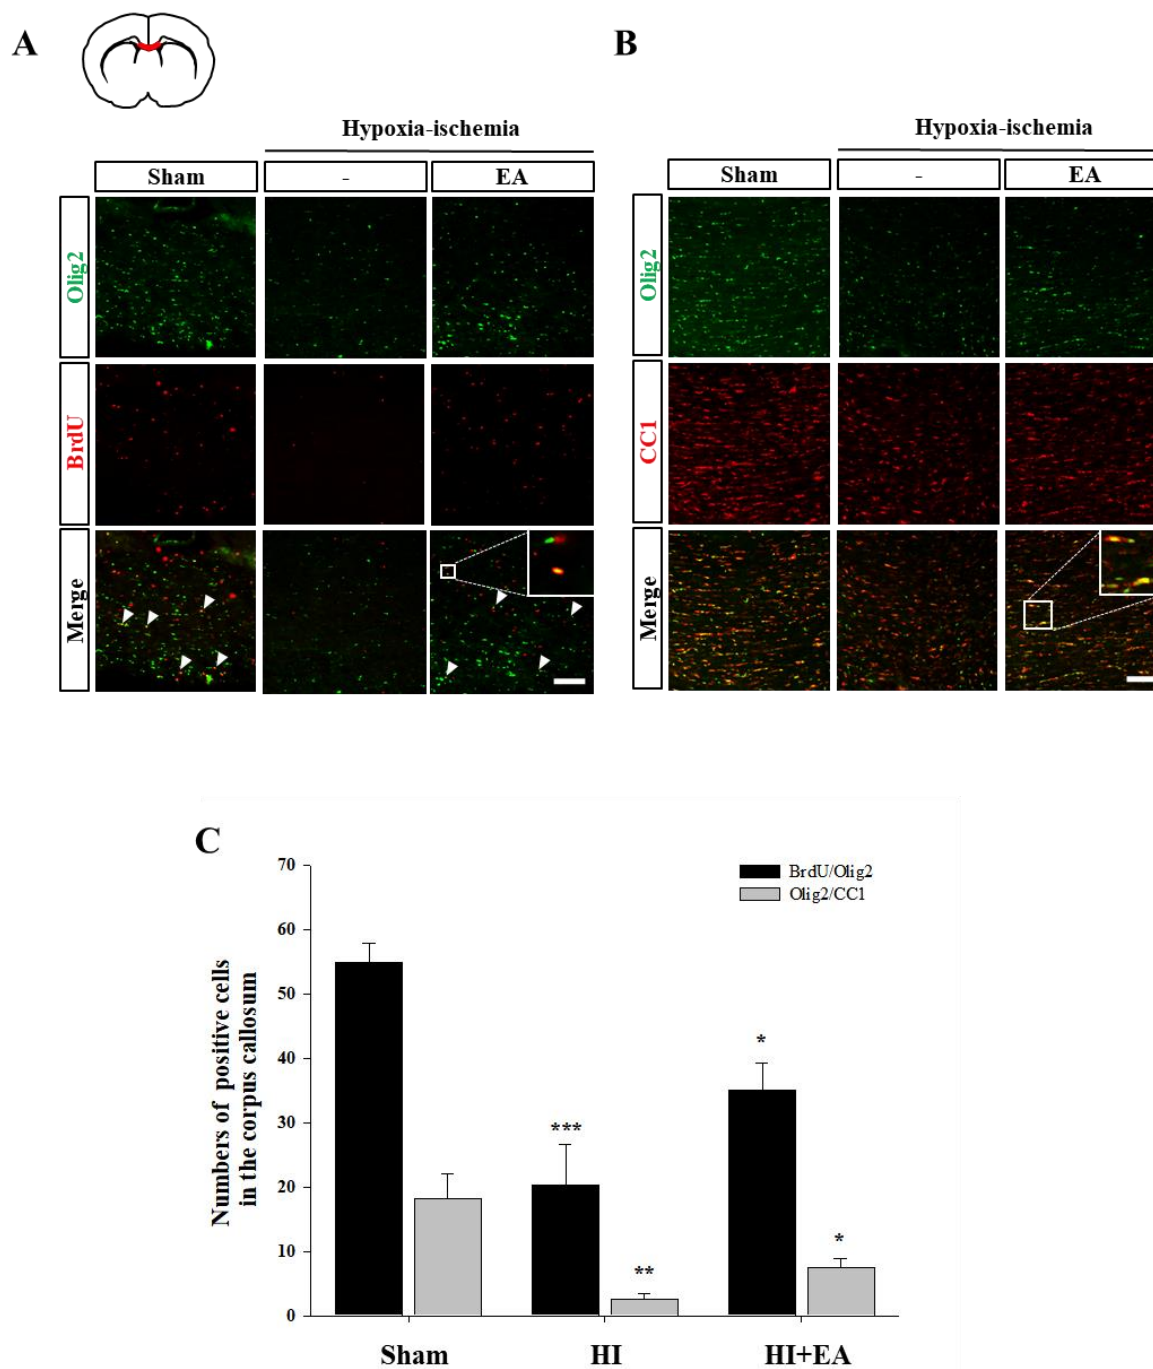

**Figure S1.** Effect of EA on the activation of oligodendrocytes in the corpus callosum. **(A)** Fluorescence staining against Olig2 (green) and BrdU (red) after EA (3mA) treatment. Scale bar = 100  $\mu$ m. **(B)** Immunofluorescence staining against Olig2 (green) and CC1 (red) after EA (3mA) treatment. Scale bar = 100  $\mu$ m. **(C)** The number of Olig2<sup>+</sup>/BrdU<sup>+</sup> cells and Olig2<sup>+</sup>/CC1<sup>+</sup> cells. Olig2<sup>+</sup>/BrdU<sup>+</sup> cells and Olig2<sup>+</sup>/CC1<sup>+</sup> cells were increased in the EA group. Data presented as mean  $\pm$  SEM. \* $P$  < 0.05, \*\* $P$  < 0.01 and \*\*\* $P$  < 0.001 vs. sham. Olig2 (NBP1-28667, Novus Biologicals, Littleton, USA); and CC1 (GTX16794, APC antibody, Gentex Corp., CA, USA).
